# Supplementary material for: LEDGIN-mediated Inhibition of Integrase–LEDGF/p75 Interaction Reduces Reactivation of Residual Latent HIV
Source: PubMed Central journal article supplement — eBioMedicine. 2016 May 13;8:248–64. doi: 10.1016/j.ebiom.2016.04.039 (PMC4919729; doi:10.1016/j.ebiom.2016.04.039), 2016-05-13
Supplement: mmc2.pdf [file mmc2.pdf]

Supplementary Figure 1 LEDGF/p75 depletion increases the silent reservoir.

(a)

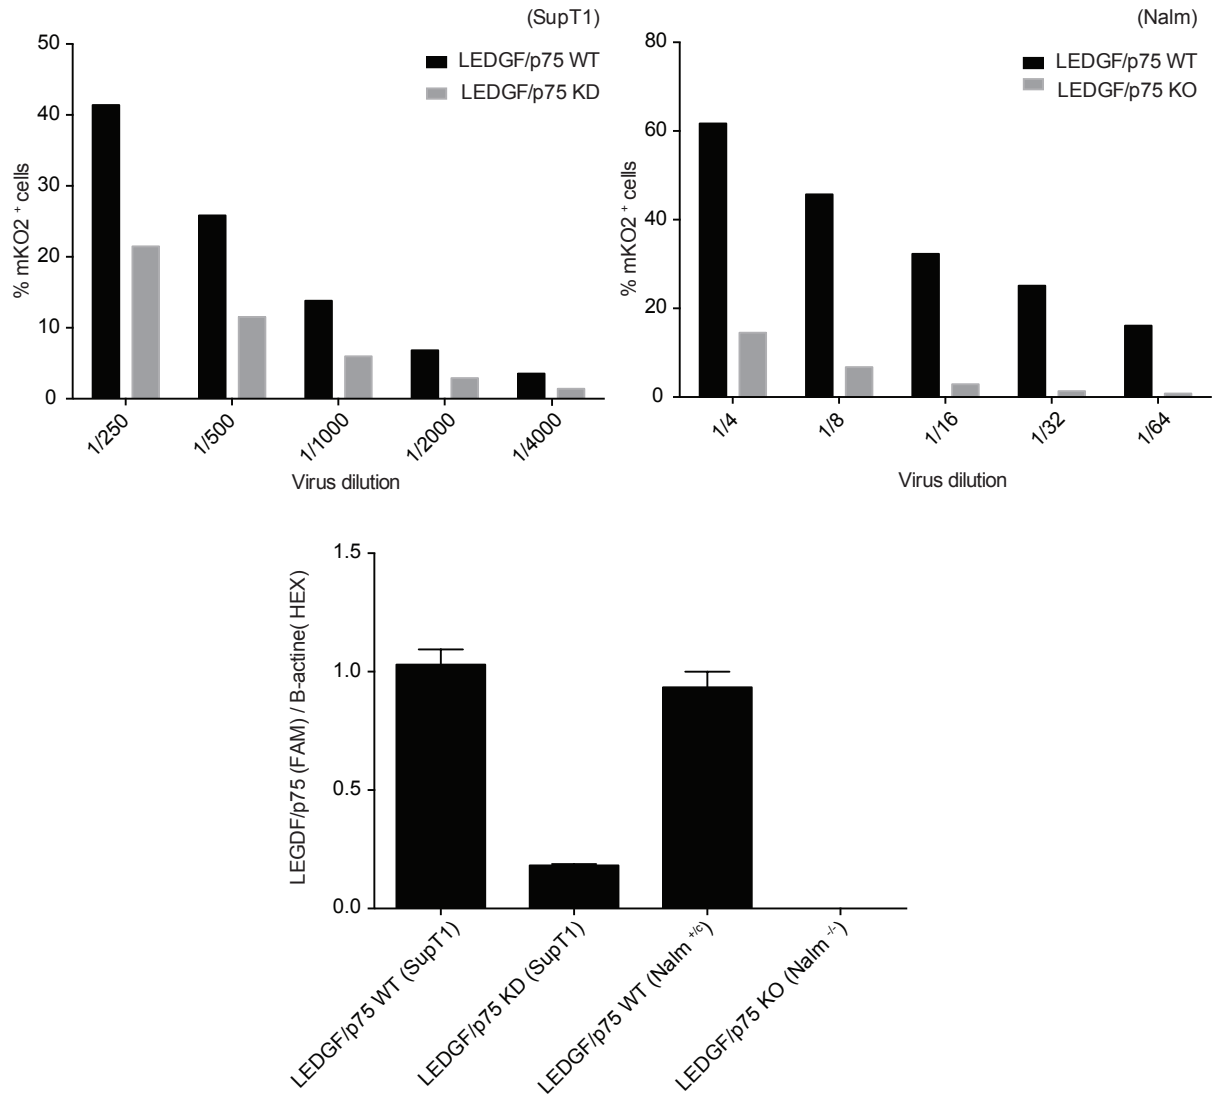

Supplementary Figure 1 LEDGF/p75 depletion increases the silent reservoir.

(b)

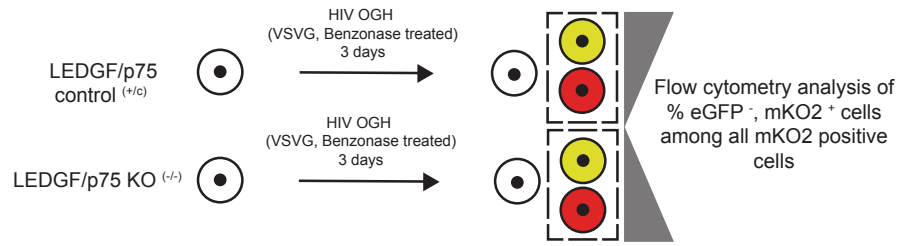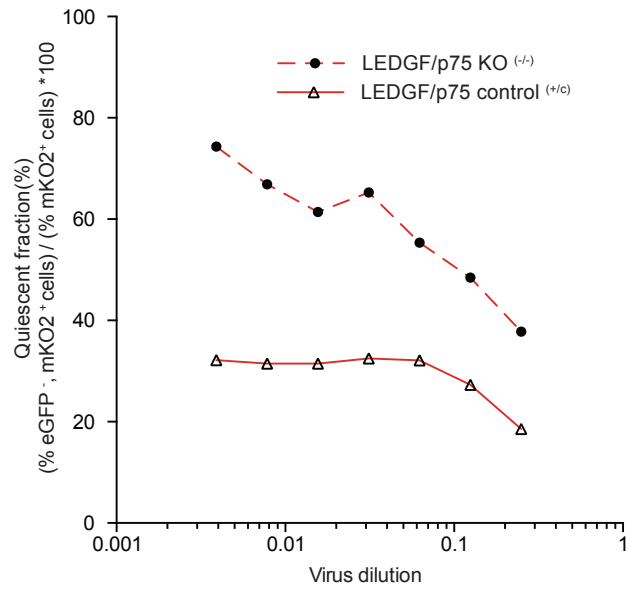

Supplementary Figure 2 LEDGIN mediated inhibition of single round lentiviral transduction.

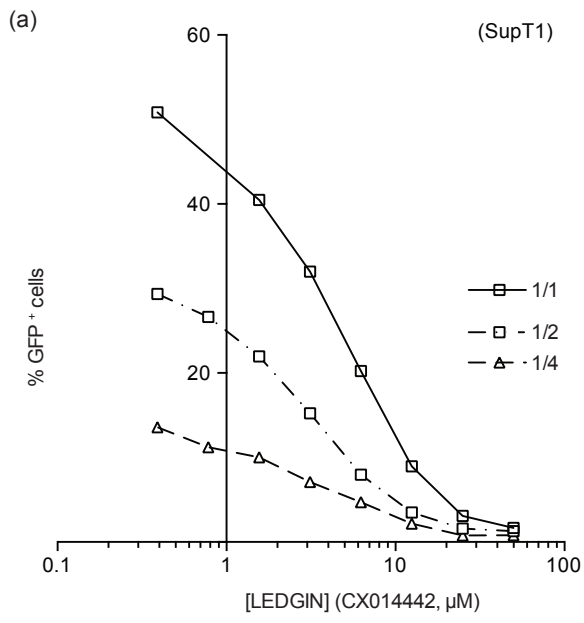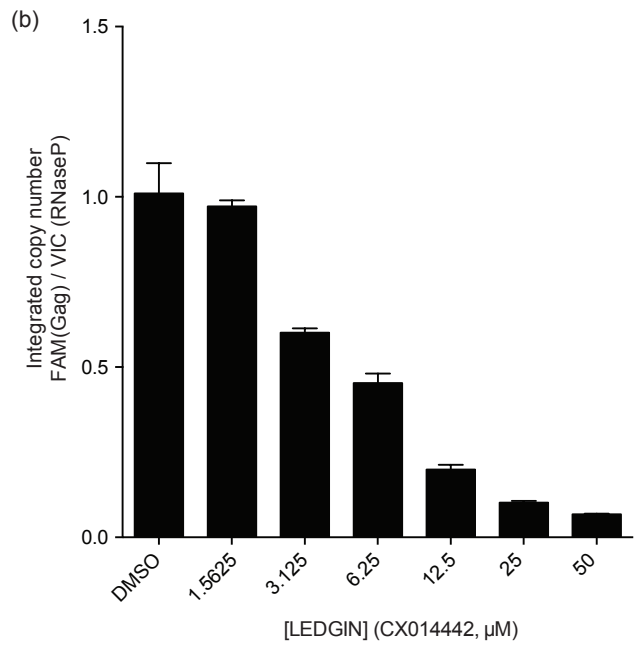

Supplementary figure 3 LEDGIN inhibition of the LEDGF/p75-IN interaction retargets lentiviral integration.

(a)

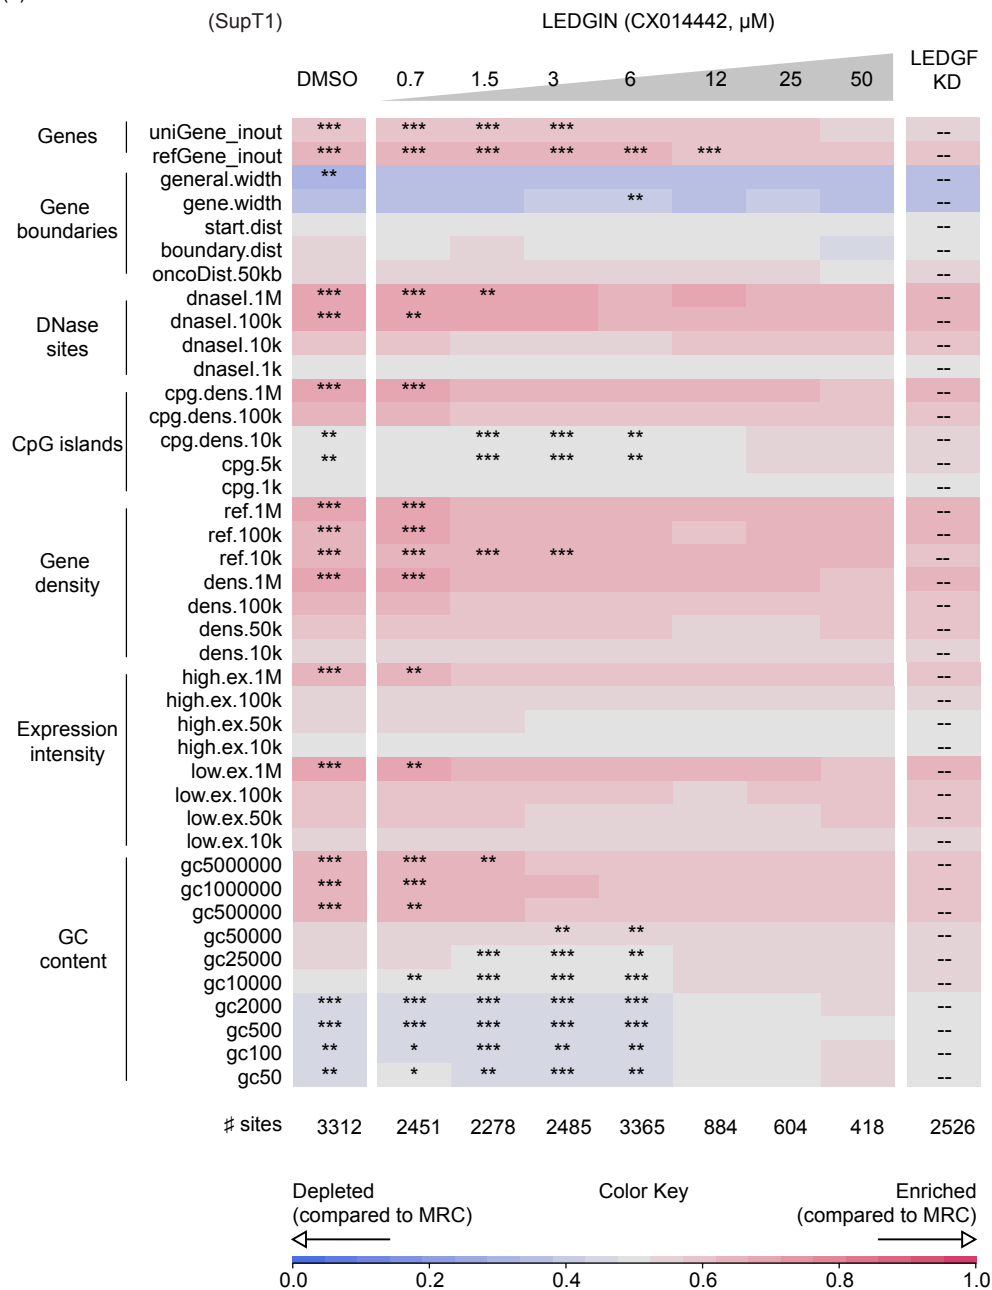

Supplementary Figure 3 LEDGIN inhibition of the LEDGF/p75-IN interaction retargets lentiviral integration.

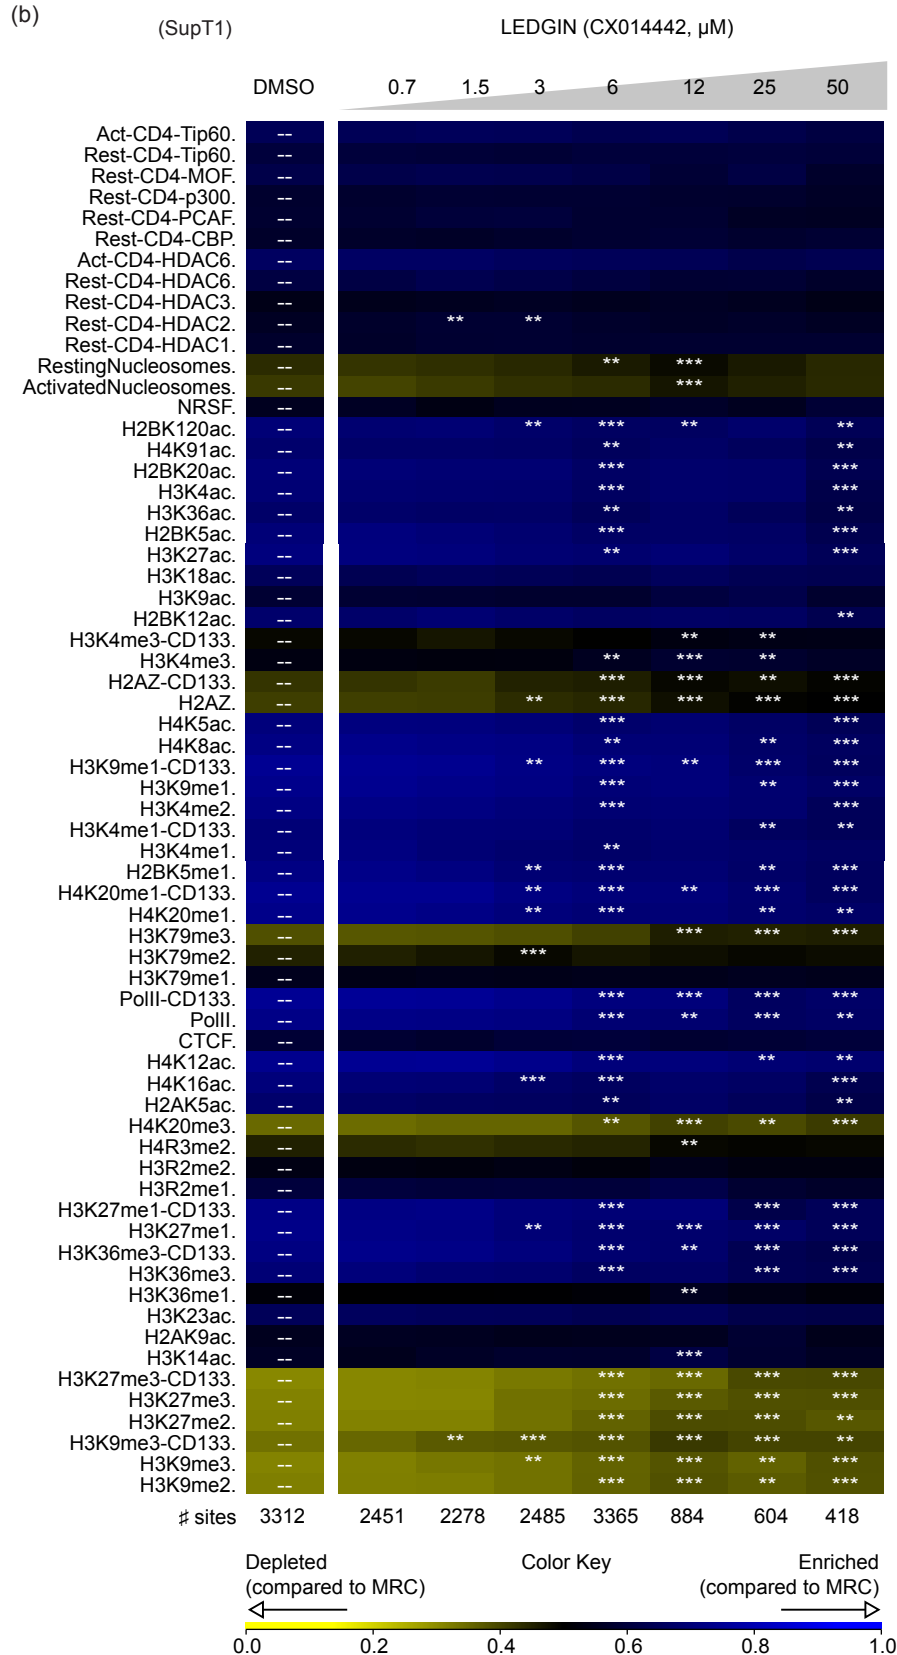

Supplementary Figure 3 LEDGIN inhibition of the LEDGF/p75-IN interaction retargets lentiviral integration.

(c)

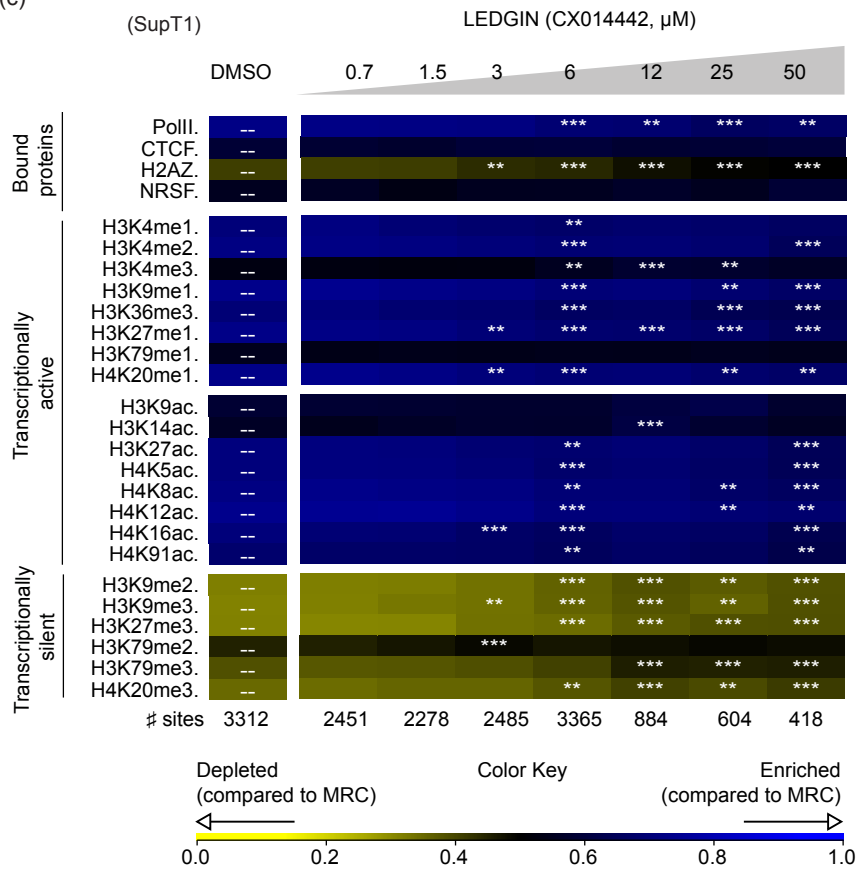

Supplementary Figure 4 LEDGIN treatment reduces reactivation from latency.

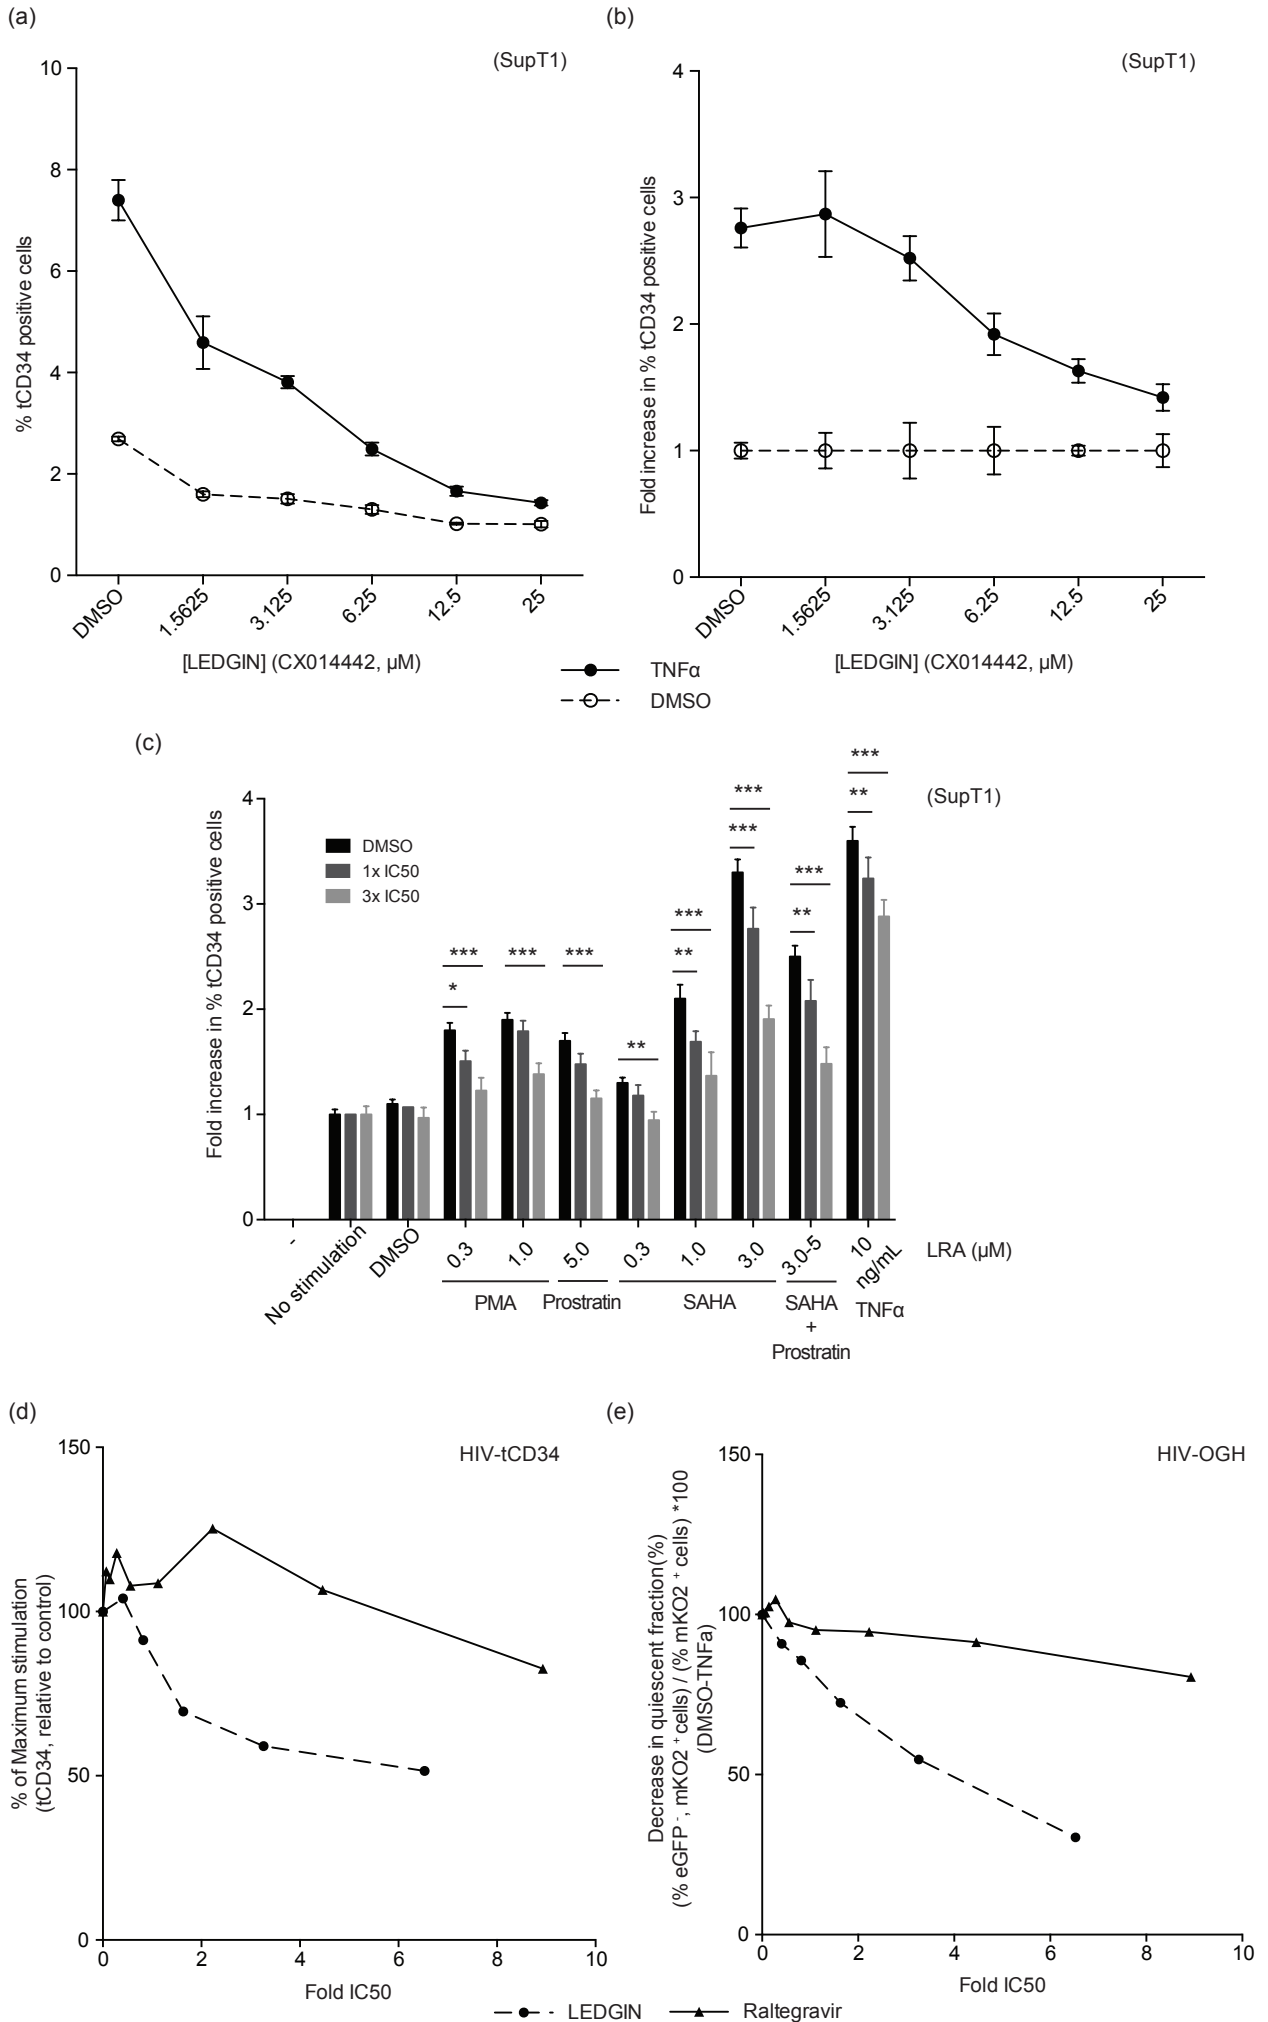

Supplementary Figure 5. Integration Site Sequence Logo remains unaffected by LEDGIN mediated inhibition of the LEDGF/p75-IN interaction.

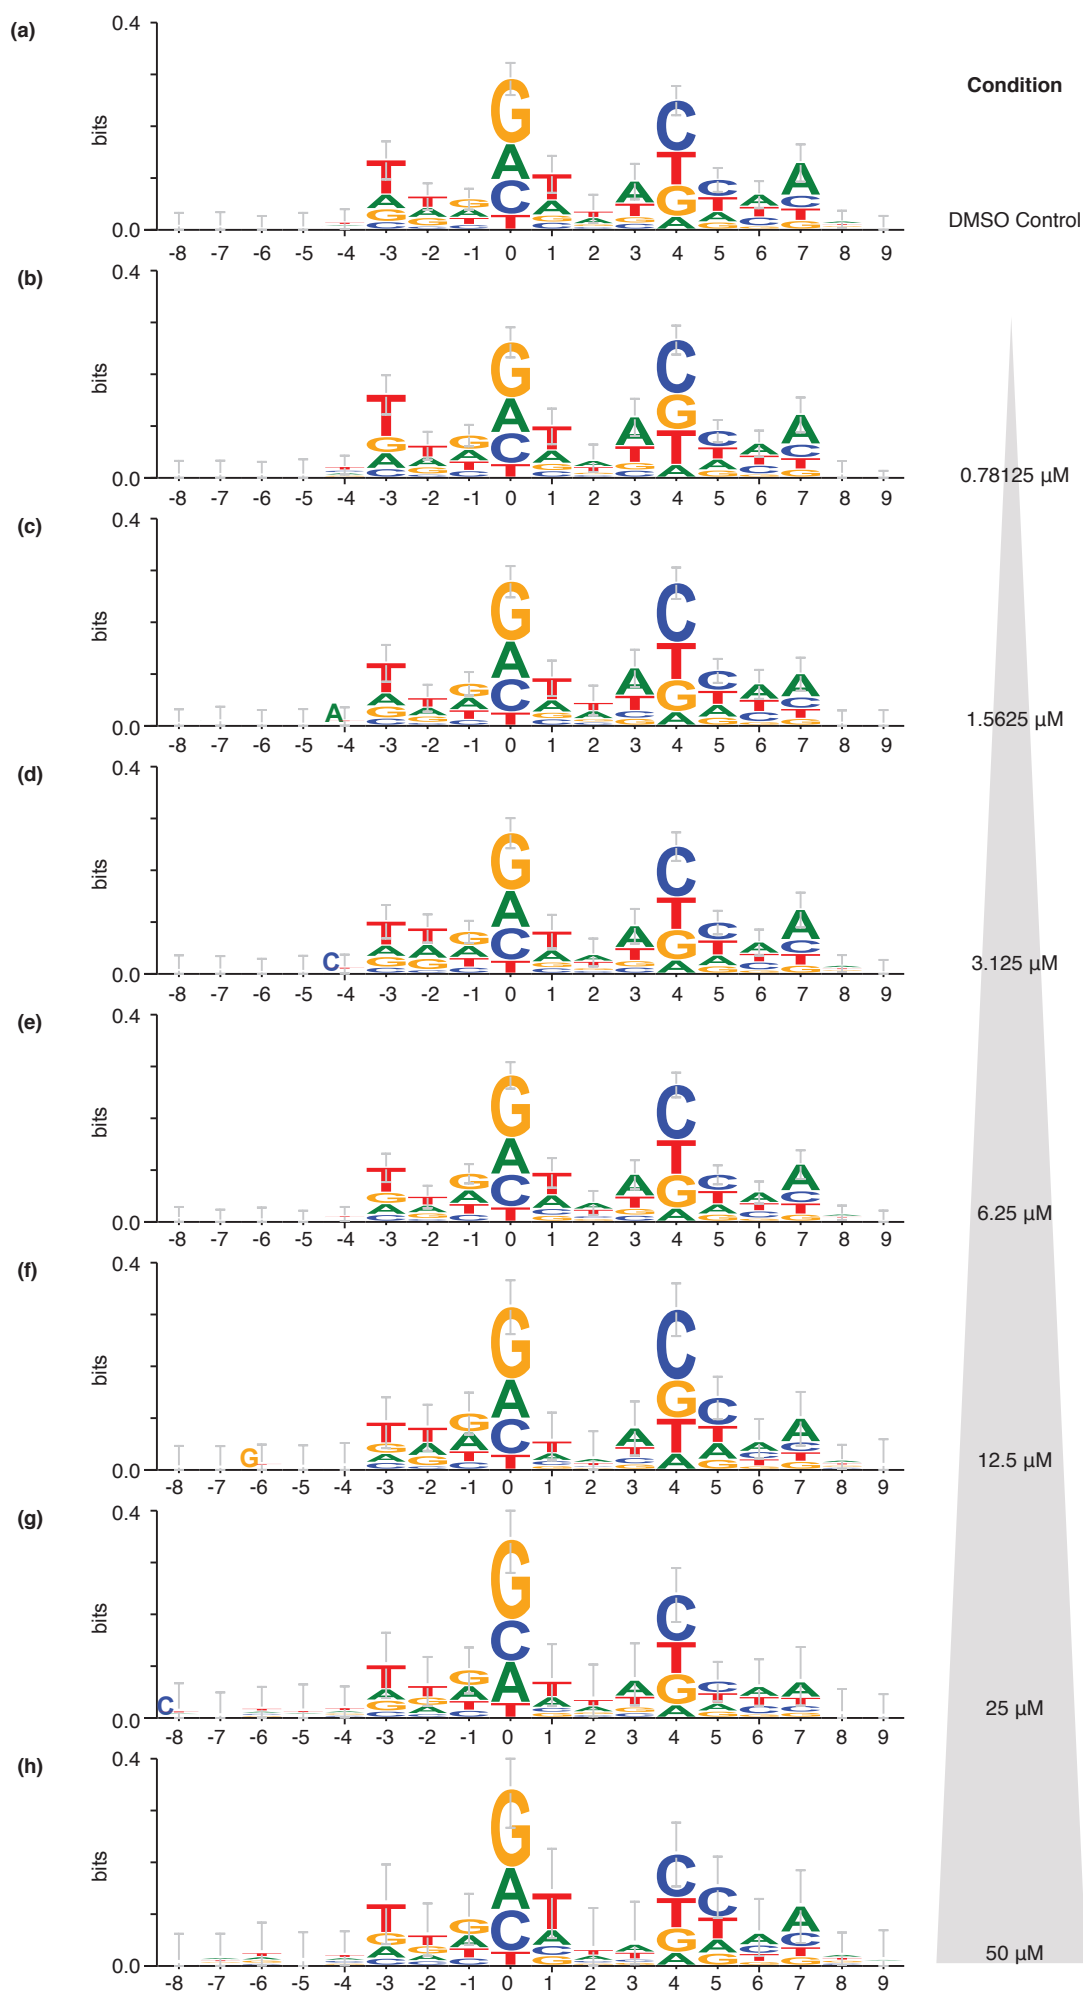



Supplementary Figure 6. LTR substrings.

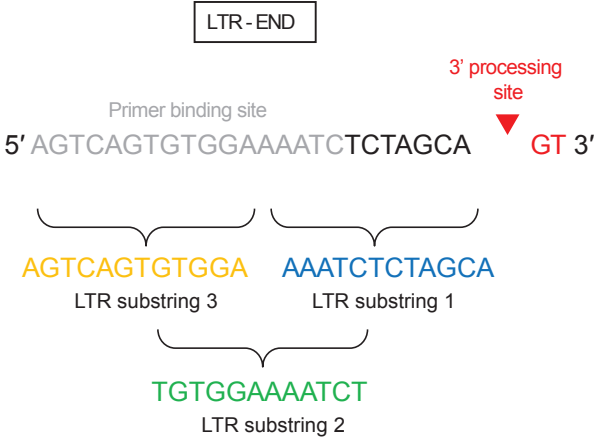

Supplementary Figure 7. Addition of LEDGINs during production results in transcriptionally silent provirus after integration.

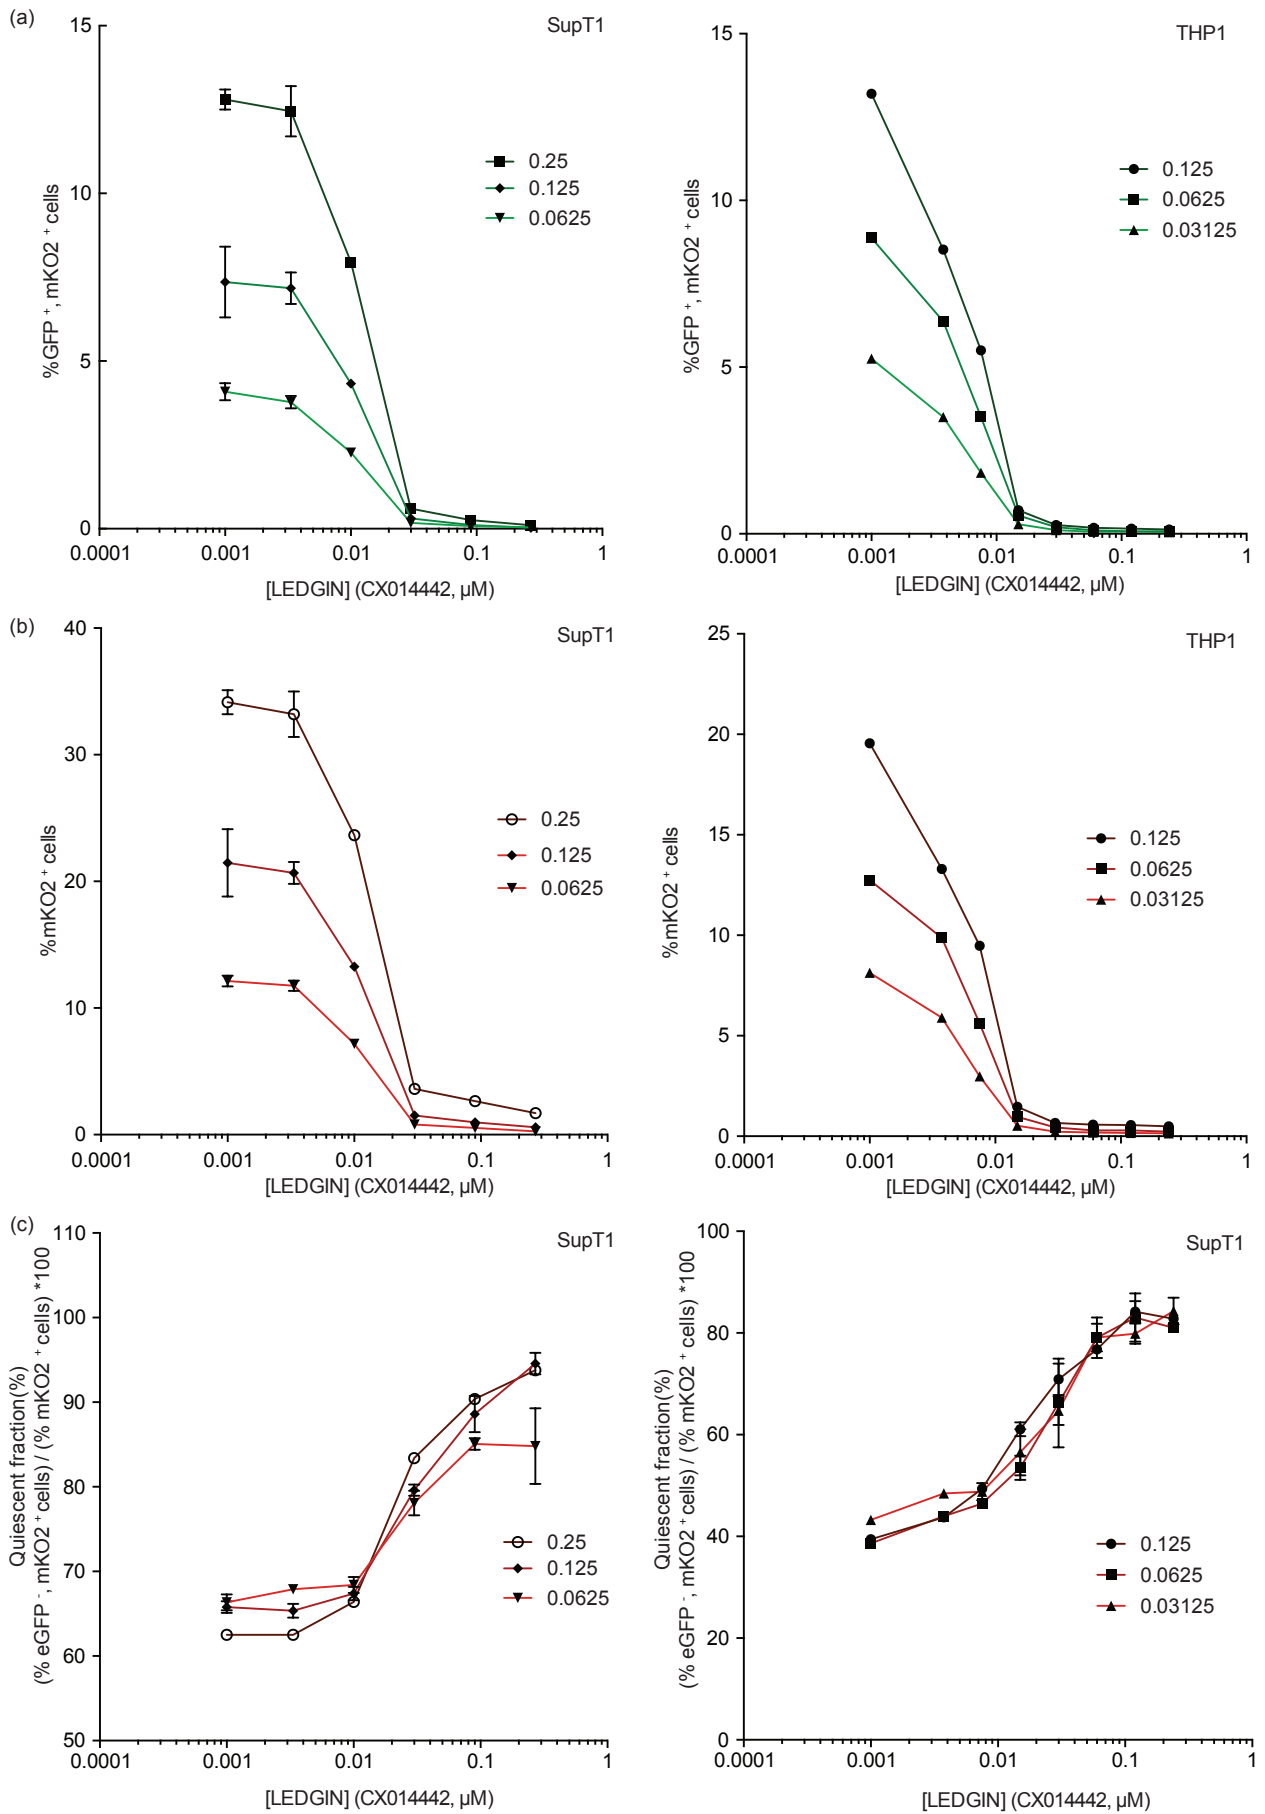

Supplementary Table 1 LEDGIN inhibition of the LEDGF/p75-IN interaction retargets lentiviral integration.

| DataSet                     | # Sites | % in RefSeq gene |
|-----------------------------|---------|------------------|
| DMSO                        | 1259    | 70.37            |
| CX05045 1x IC <sub>50</sub> | 2693    | 69.18            |
| CX05045 5x IC <sub>50</sub> | 791     | 61.95 ***        |

Supplementary Table 2 Percentage of imperfect LTR – chromosome junctions.

| DataSet | % Imperfect LTR-Chromosome junctions |
|---------|--------------------------------------|
| DMSO    | 1.25                                 |
| 0.78125 | 1.32                                 |
| 1.5625  | 1.51                                 |
| 3.125   | 1.68                                 |
| 6.25    | 1.37                                 |
| 12.5    | 0.65                                 |
| 25      | 1.86                                 |
| 50      | 2.58                                 |

Supplementary Table 3 Integration orientation

| DataSet | % Integrations in Refseq genes having an opposite orientation |
|---------|---------------------------------------------------------------|
| DMSO    | 46.21 -                                                       |
| 0.78125 | 47.52 *                                                       |
| 1.5625  | 49.34 *                                                       |
| 3.125   | 49.83 *                                                       |
| 6.25    | 49.43 *                                                       |
| 12.5    | 51.76 **                                                      |
| 25      | 49.71 *                                                       |
| 50      | 56.70 ***                                                     |
